# Supplementary material for: Plasma Exchange versus Intravenous Immunoglobulin in Worsening Myasthenia Gravis: A Systematic Review and Meta-Analysis with Special Attention to Faster Relapse Control
Source: Biomedicines. 2023 Nov 29;11(12):3180. doi: 10.3390/biomedicines11123180 (PMC10740589; doi:10.3390/biomedicines11123180)
Supplement: Supplementary file 1 [file biomedicines-11-03180-s001.zip]

Archive with 5 entries (5 files):
- Suppl table 1.pdf
- Supplementary Figure 1.pdf
- Supplementary Figure 2 docx.pdf
- Supplementary Figure 3.pdf
- Supplementary Figure 4.pdf
