# Supplementary figures and images for: Plasma Exchange versus Intravenous Immunoglobulin in Worsening Myasthenia Gravis: A Systematic Review and Meta-Analysis with Special Attention to Faster Relapse Control
Source: MDPI journal article supplement (doi:10.3390/biomedicines11123180), 2023-11-29

**Suppl. Fig. 2**

Funnel plots for change in QMG (odds ratio)

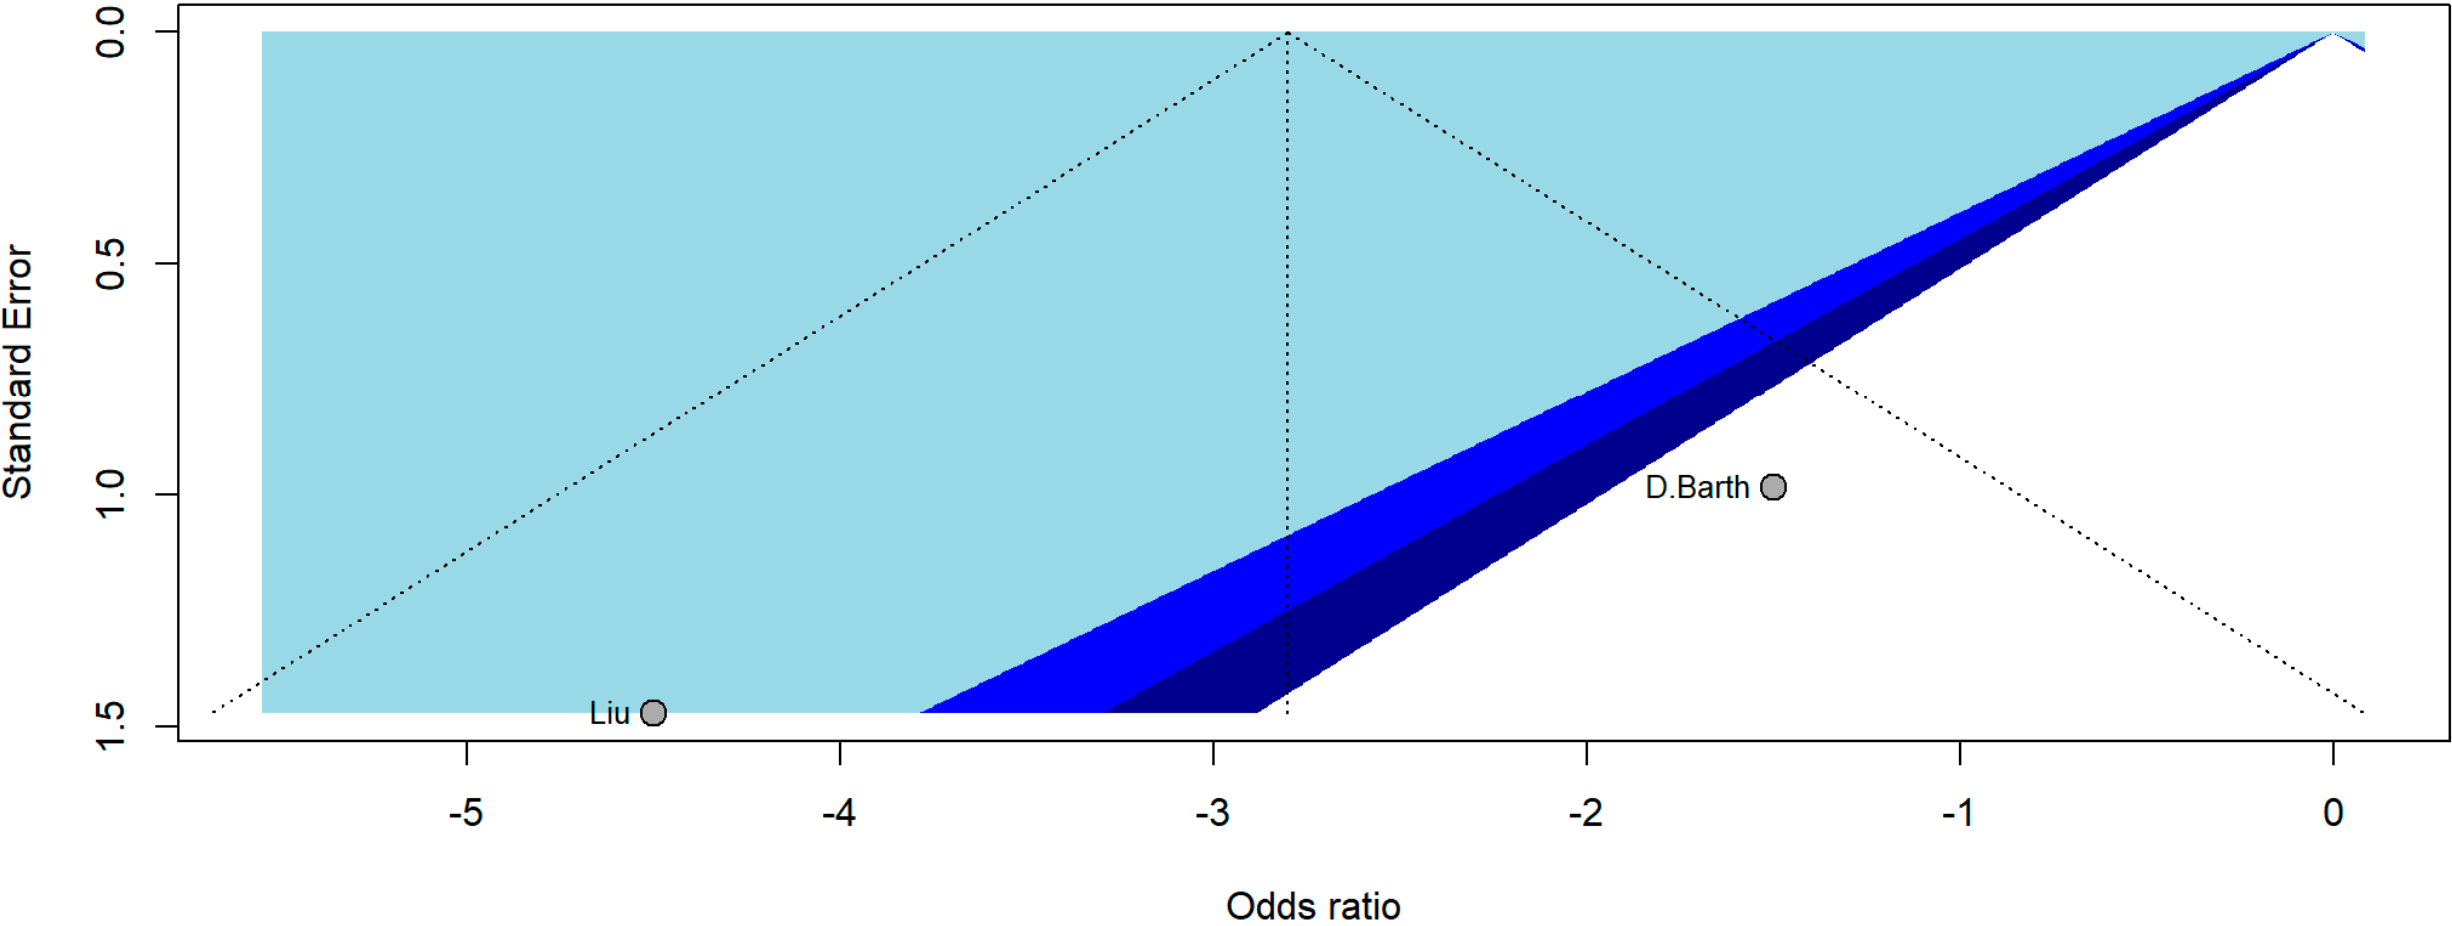

Supplement: s1 [file s1]

**Suppl. Fig. 1**  
Funnel plots for change in QMGS (mean difference)

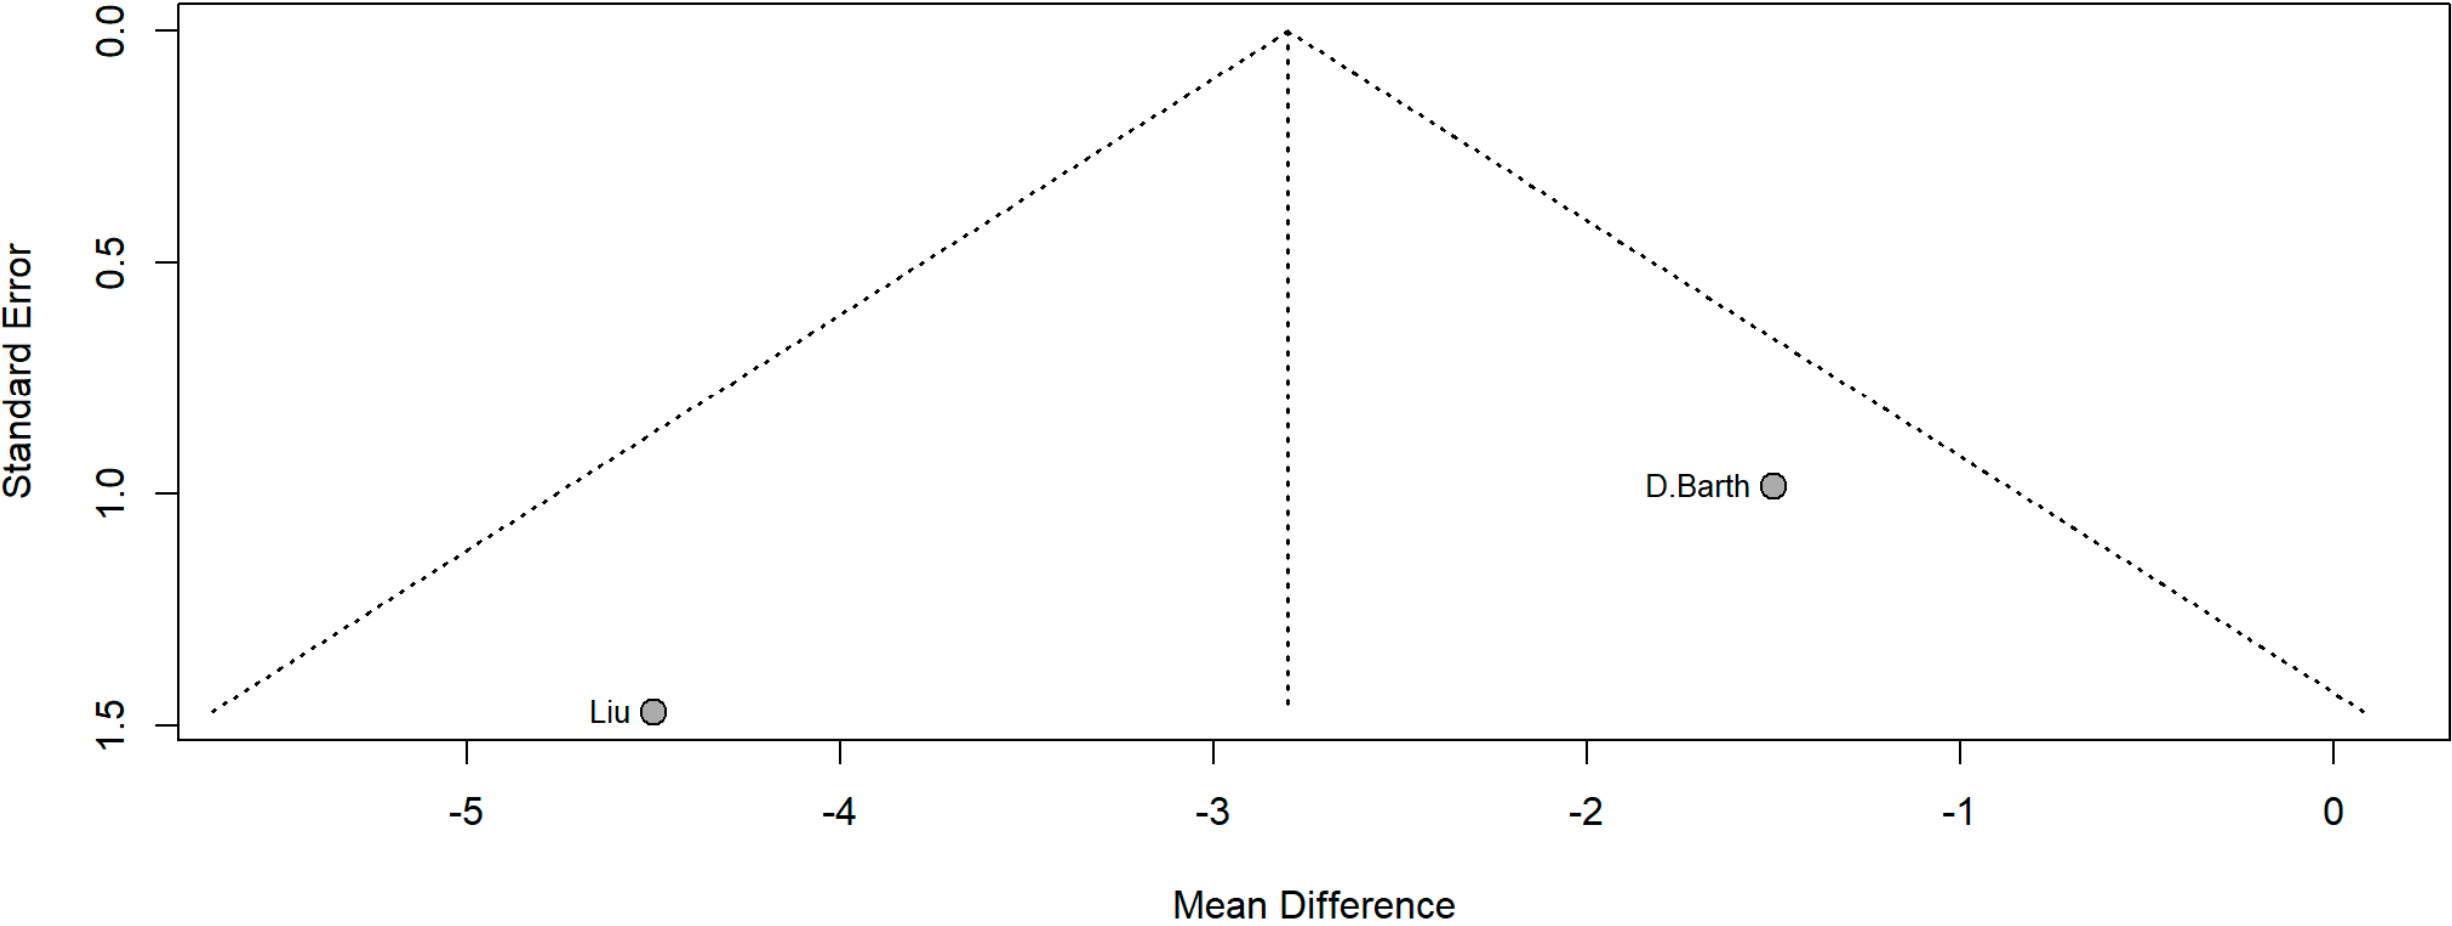

Supplement: s1 [file s1]

**Suppl. Fig 3**  
Funnel plots for adverse events (odds ratio V1.)

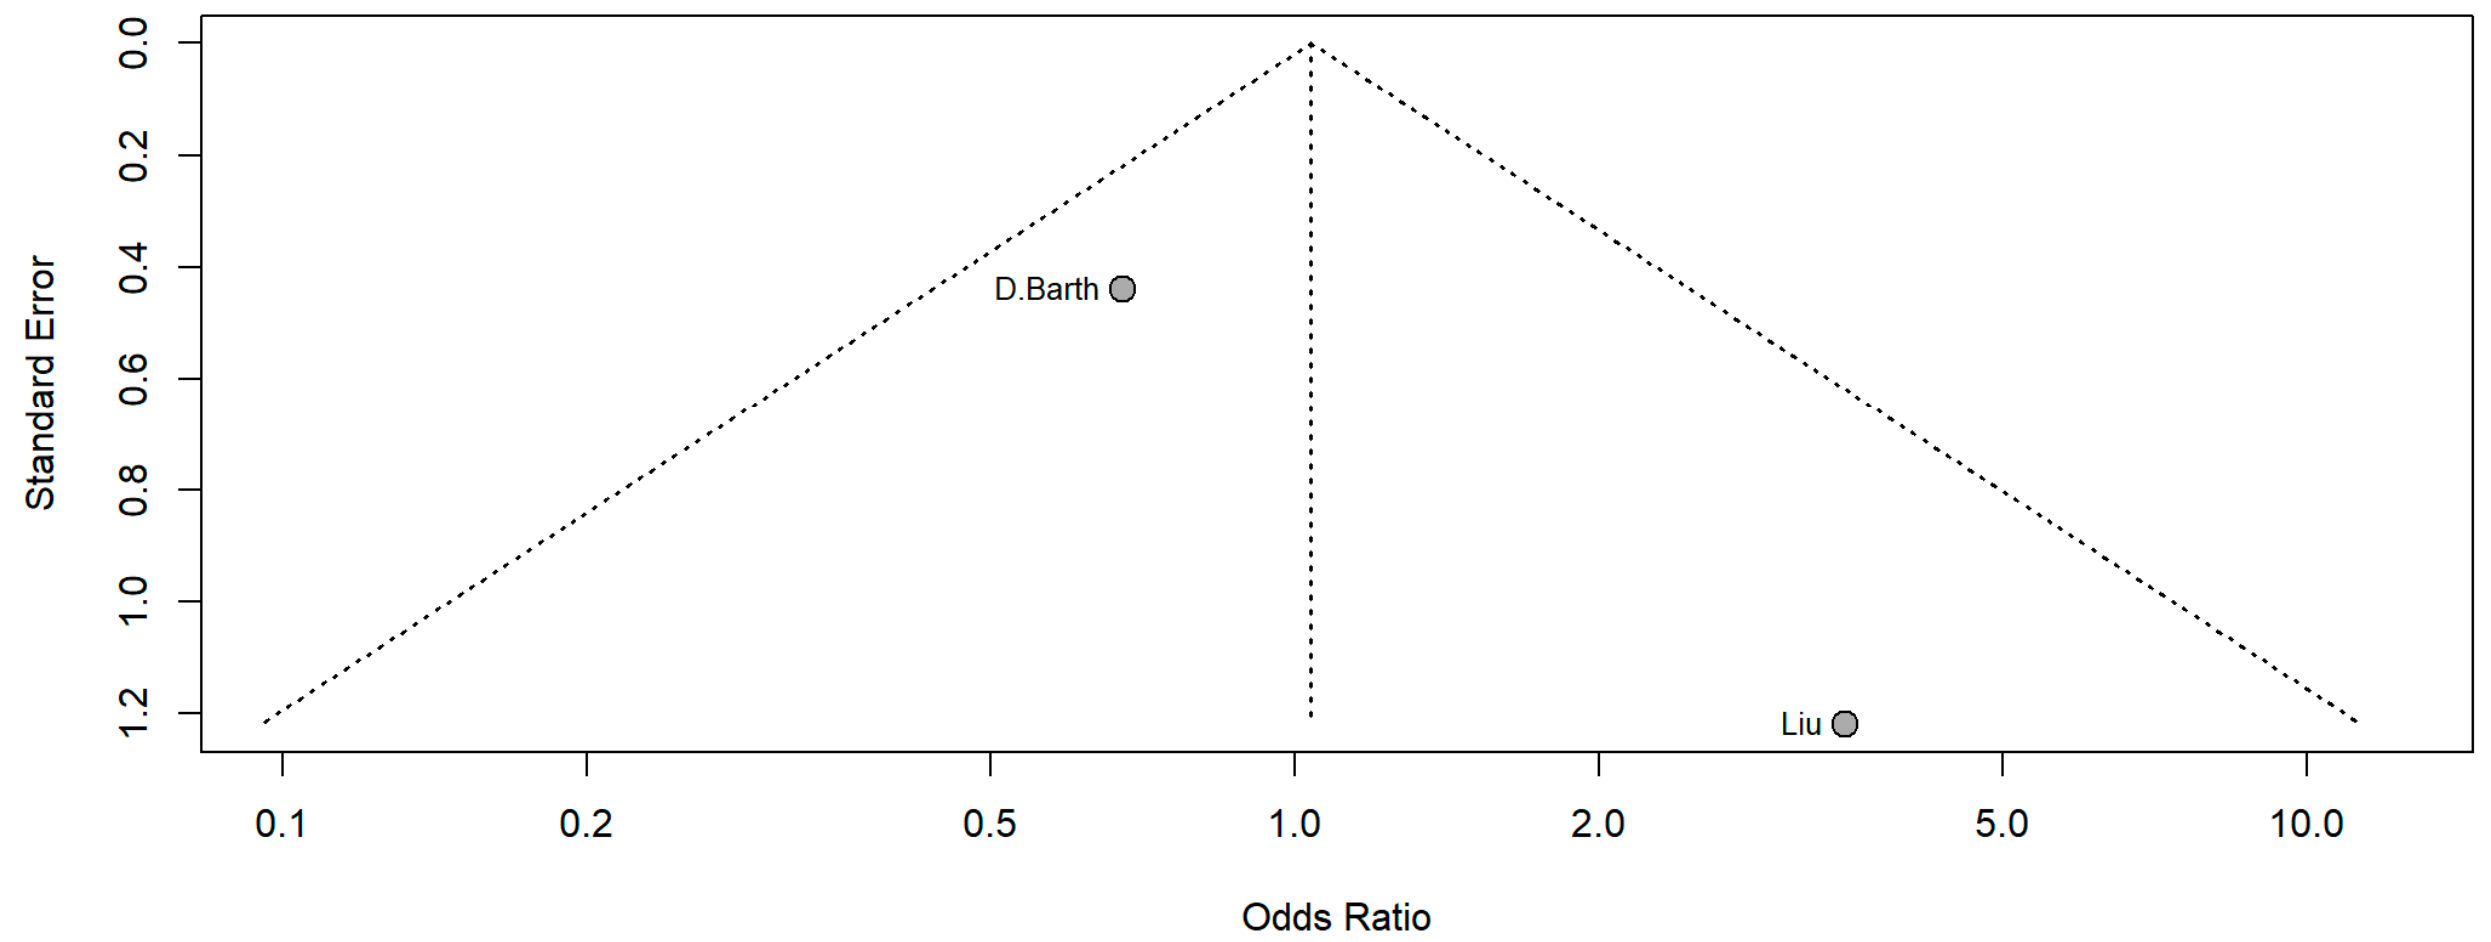

Supplement: s1 [file s1]

**Suppl. Fig. 4**  
Funnel plots for adverse events (Odds ratio V2.)

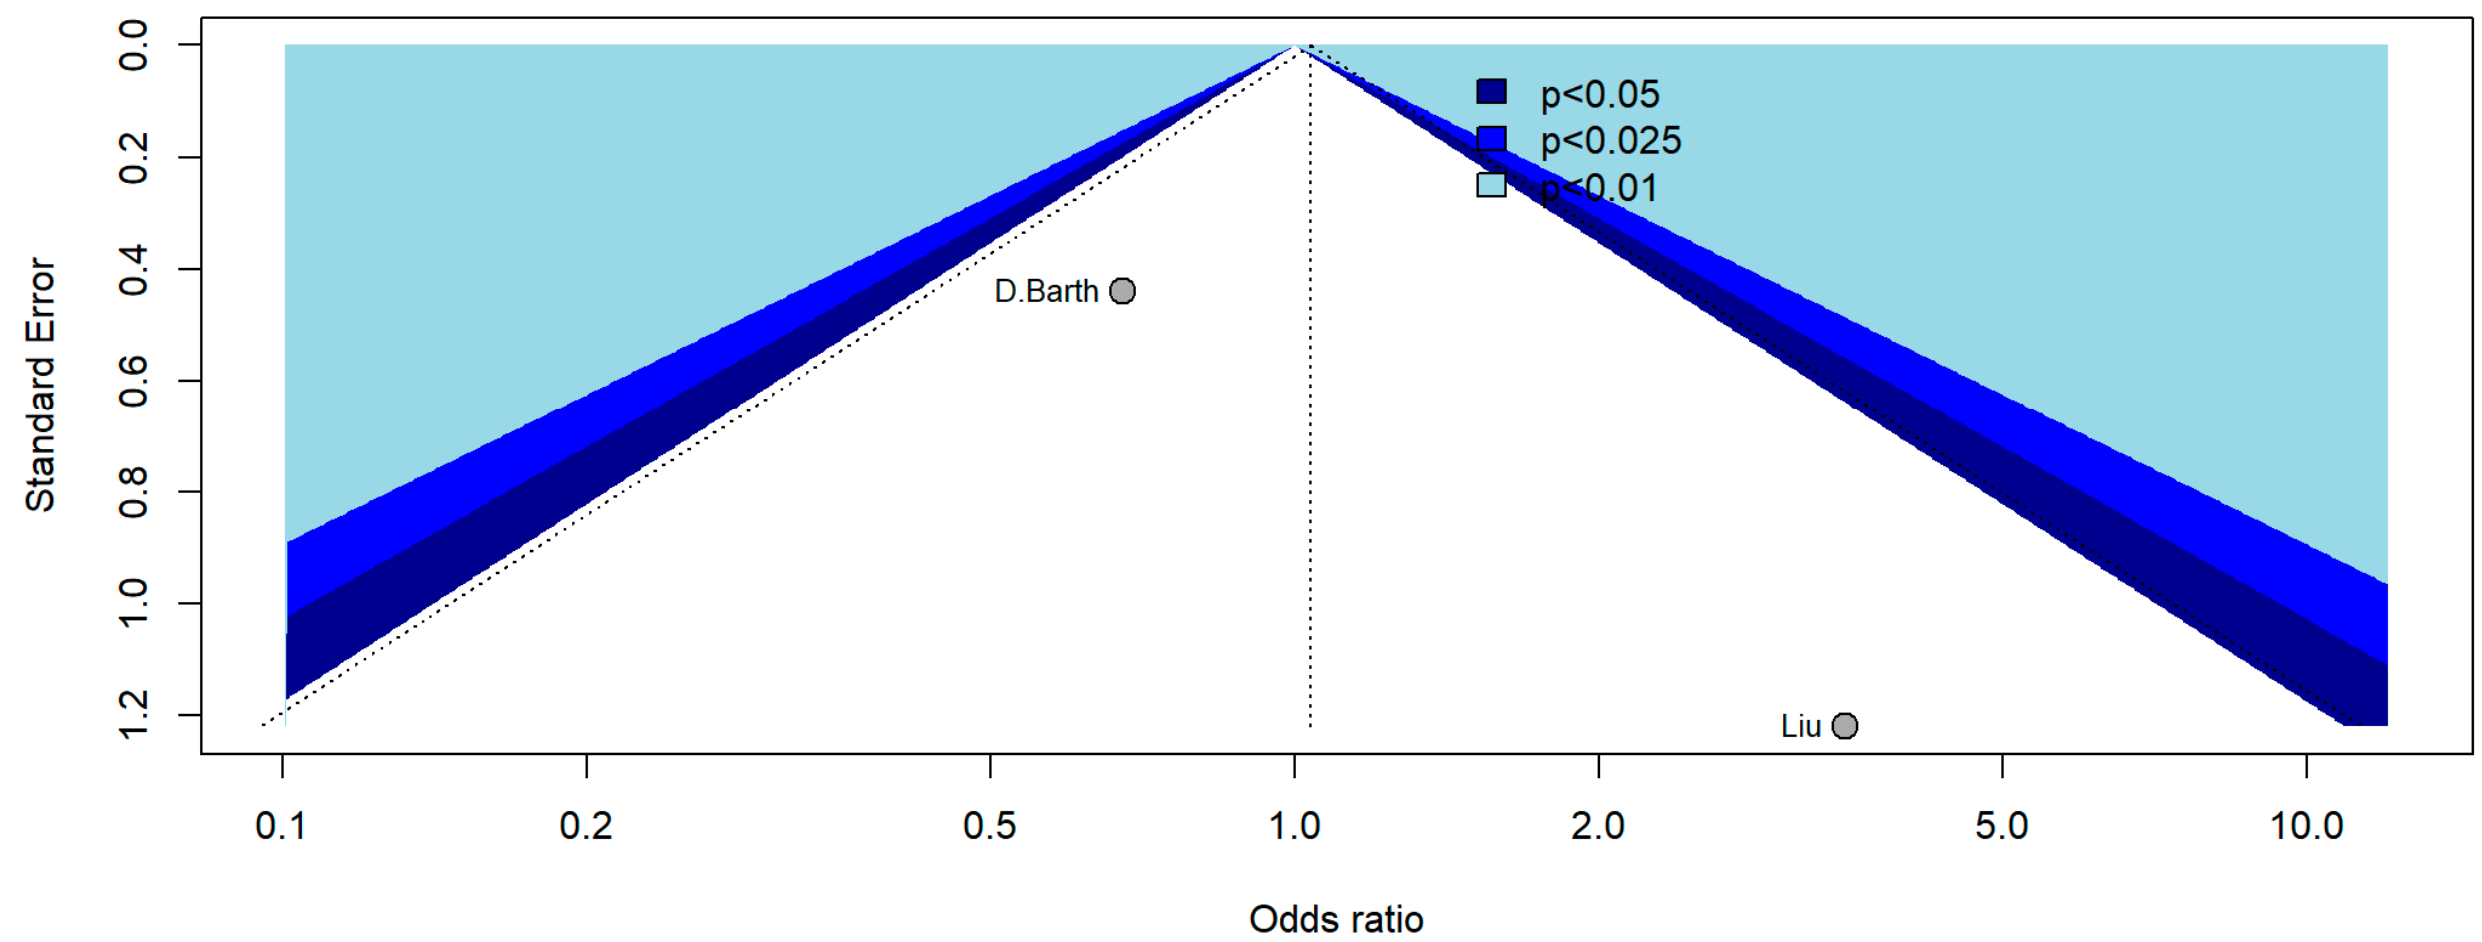

Supplement: s1 [file s1]
